# Supplementary material for: Tissue-specific expression and post-translational modifications of plant- and bacterial-type phosphoenolpyruvate carboxylase isozymes of the castor oil plant, Ricinus communis L
Source: PubMed Central journal article supplement — J Exp Bot. 2011 Aug 12;62(15):5485–95. doi: 10.1093/jxb/err225 (PMC3223045; doi:10.1093/jxb/err225), 2011-08-12
Supplement: supp_err225_00063230_file001.pdf [file supp_err225_00063230_file001.pdf]

**Tissue-specific expression and post-translational modifications of plant- and bacterial-type phosphoenolpyruvate carboxylase isozymes of the castor oil plant, *Ricinus communis* L.**

*B. O'Leary, E. T. Fedosejevs, A. T. Hill, J. Bettridge, J. Park, S. K. Rao, C. A. Leach, and W. C. Plaxton*

**Supplemental Fig. S1.** Sequence alignment of cDNA-deduced primary structures of castor PTPC (RcPPC1 and RcPPC3) and BTPC (RcPPC4) isozymes. Experimentally verified *in vivo* phosphorylation (Ser-11 and Ser-425 of RcPPC3 and RcPPC4, respectively) and monoubiquitination (Lys-628 of RcPPC3) sites are indicated with arrows and a bold/red font. RcPPC4's highly divergent ~10-kDa domain that was predicted to exist largely as an intrinsically disordered region (O'Leary et al., 2011) is enclosed in a red rectangle. Boxes I-III denote conserved subdomains essential for PEPC catalysis (Izui et al., 2004). The predicted  $M_r$  of each deduced polypeptide and their % sequence identity with RcPPC1 is also indicated. The corresponding NCBI protein accession numbers are as follows: RcPPC1 (PTPC), ABR29877.1; RcPPC3 (PTPC), ABR29876; RcPPC4 (BTPC) ABR29876.1. Semi-colons and asterisks indicate identical and conserved amino acids respectively. Sequences were aligned using the Clustal W software (<http://www.ebi.ac.uk/Tools/msa/clustalw2/>).

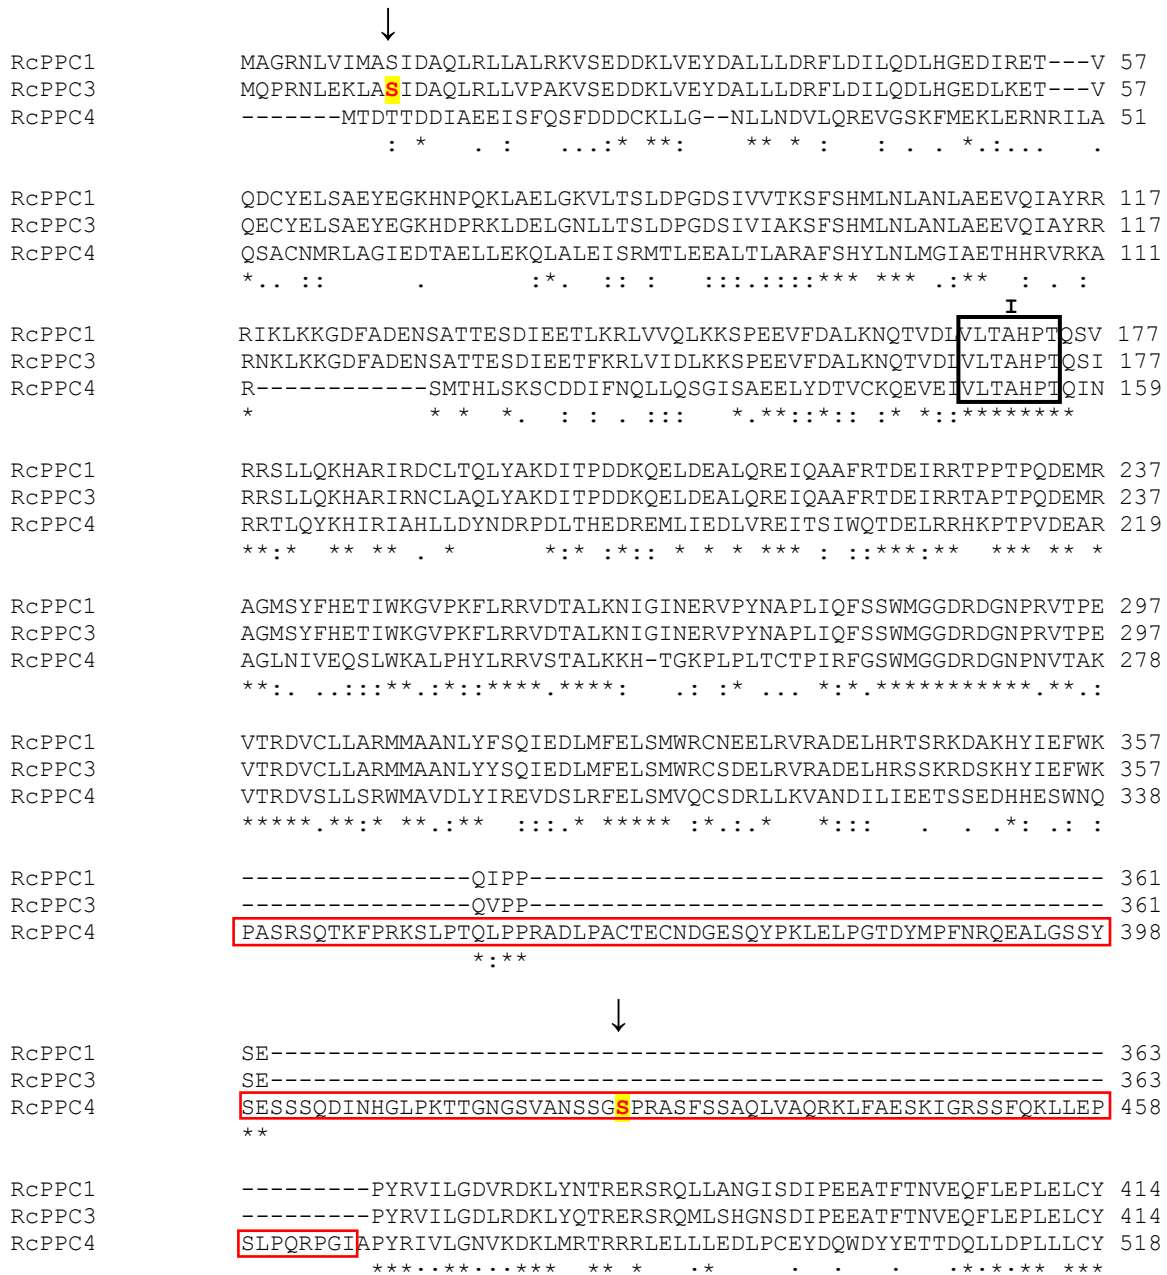

RcPPC1 RSLCACGDRPIADGSLLDLFLRQVSTFGLSLVRDLRQESERHTDVLDAITKHLGIGFYRE 474  
RcPPC3 RSLCSCGDQPIADGSLLDLFLRQVSTFGFSLVRDLRQESDRHTDVMdTITKHLIIGSYRE 474  
RcPPC4 ESLQSCGAGVLADGRLADLIRRVATFGMVLMLKLDLRQESGRHADTLDAITKYLEMGTYSE 578  
.\* \* : \* \* : \* \* \* \* \* : \* \* : \* \* : \* \* \* \* \* : \* \* : \* \* : \* \* \* \* \* : \* \* \* \* \*

RcPPC1 WSEEHRQEWLLTELGRKRPLFGPDLPKTDEIADVLDTFHVIAELPADNFGAYIISMATAP 534  
RcPPC3 WSEERRQEWLLSELSGKRPLFGPDLQRTDEVADVLDTFHVIAELPADSFGAYIISMATAP 534  
RcPPC4 WDEEKKLEFLTRELGKRPLVPPTIEVAPDVKEVLDAFRVAEELGSDSLGAYVISMASNA 638  
\* . \* \* : \* \* \* \* \* \* \* \* \* \* \* : \* \* : \* \* : \* \* \* \* \* \* \* \* \* \* \* : \* \* : \* \* : \* \* \* \* \* : \*

RcPPC1 SDVLAVELLQRECRVKQP-----LRVVPLFEKLADLEAAPAAVARLFSIDWYRN 583  
RcPPC3 SDVLAVELLQRECHVKQP-----LRVVPLFEKLADLEAAPAALARLFSIDWYRN 583  
RcPPC4 SDVLAVELLQKDARLAVSGELGRPCPGGTLRVVPLFETVKDLRGAGSVIRKLLSIDWYRE 698  
\*\*\*\*\* : \* \* : \* \* : \* \* \* \* \* : \* \* \* \* \* : \* \* \* \* \* : \* \* \* \* \* : \* \* \* \* \*

II ↓ III

RcPPC1 ----RINGKQEVMI GYSDSGKDAGRLSAAWQLYKAQEELVKVAKQYGVKLTMFHGRGGTV 639  
RcPPC3 ----RINGKQEVMI GYSDSGKDAGRFSAAWQLYKAQEELIKVAKQFGV KLTMFHGRGGTV 639  
RcPPC4 HIIKNHNGHQEVMV GYSDSGKDAGRFTAAWELYKAQEDVVAACNDFGIKVTLFHGRGGS 758  
. \* \* : \* \* \* \* \* : \* \* \* \* \* \* \* \* \* \* \* : \* \* : \* \* : \* \* \* \* \* : \* \* : \* \* : \* \* \* \* \* : \*

RcPPC1 GRGGGPTHLAISLQPPDTIHGSLRVTVQGEVIEQSFGEELCFRTLQRFATAATLEHGMP 699  
RcPPC3 GRGGGPTHLAISLQPPDTIHGSLRVTVQGEVNEQSCGEEHLCFRTLQRFATAATLEHGMP 699  
RcPPC4 GRGGGPTYLAIQSPPGSMVMTLRSTEQGEMVQAKFGLPHTAIRQLEIYTTAVLLATLRP 818  
\*\*\*\*\* : \* \* \* \* \* : \* \* \* \* \* : \* \* \* \* \* : \* \* \* \* \* : \* \* \* \* \* : \* \* \* \* \* : \* \* \* \* \*

RcPPC1 PVSPKPE-WRTLLDEMAYIATKEYRSIVFQEPREFVEYFRLATPELEYGRMNIGSRPSKRK 758  
RcPPC3 PVSPKPE-WRKLMDEMAYIATEEYRSIVFKEPREFVEYFRLATPELEYGRMNIGSRPSKRK 758  
RcPPC4 PHPPREEQWRNVMEIEISKISQNYRSTVYENPEFLAYFHEATPQAEELGFLNIGSRPTRRK 878  
\* . \* : \* \* \* \* \* : \* \* : \* \* : \* \* \* \* \* : \* \* : \* \* : \* \* \* \* \* : \* \* : \* \* : \* \* \* \* \* : \*

RcPPC1 PGGIESLRIPWIFAWTQTRFHLPVWLGFGPAFKHVIKDVRLHMLQEMYNQWPPFRV 818  
RcPPC3 PGGIESLRIPWIFAWTQTRFHLPVWLGFGAAFKHVIQKDVRLHMLQEMYNEWPPFRV 818  
RcPPC4 SSTGIGHLRIPWVFAWTQTRFVLPWLVGAGLKGACEKGF--EDLKAMYKEWPPFFQS 936  
. \* \* \* \* \* : \* \* \* \* \* \* \* \* \* \* \* : \* \* \* \* \* : \* \* \* \* \* : \* \* \* \* \* : \* \* \* \* \*

RcPPC1 TIDLVMVFAKGDPGIAALYDKLLVSEELWPFGERLRVNYEETKHLLLQVAGHKDLLEGD 878  
RcPPC3 TIDLVMVFAKGDPGIAALYDKLLVSDLWSFGERLRTNYEETKRLLLQIAGHKDLLEGD 878  
RcPPC4 TIDLIEMLVGLKADIPIAKHDEVLVSESRRELGAELRSELLTTEKYVLVSGHEKLSQNN 996  
\* \* \* : \* \* \* : \* \* \* \* \* \* \* \* \* \* \* : \* \* \* \* \* : \* \* : \* \* : \* \* : \* \* : \* \* : \* \* : \*

RcPPC1 PYLKQRLRLRDYITTLNVCQAYTLKRIRDPDYHVTLRPHLSKEHMESSKPAELVKLNP 938  
RcPPC3 PYLKQRLRLRDSYITTLNVCQAYTLKRIRDPNYVTLRPHISKEIMESSKPADELVKLNP 938  
RcPPC4 RSLRRLIESRLPYLNPMMMLQVEVLKRLRRDDNNKLR----- 1034  
\* \* : \* \* : \* \* \* \* \* : \* \* \* \* \* : \* \* \* \* \* : \* \* \* \* \* : \* \* \* \* \*

|        |                                 | <u>Identity (%)</u> | <u>M<sub>r</sub> (kDa)</u> |
|--------|---------------------------------|---------------------|----------------------------|
| RcPPC1 | RSEYAPGLEDTLILTMKGIAAGMQNTG 965 | <b>100</b>          | <b>110.5</b>               |
| RcPPC3 | KSDYAPGLEDTLILTMKGVAAGLQNTG 965 | <b>91</b>           | <b>110.6</b>               |
| RcPPC4 | -----DALLITINGIAAGMRNTG 1052    | <b>41</b>           | <b>118.5</b>               |

\* : \* : \* : \* : \* : \* : \* : \* : \*

**References**

**Kai Y, Matsumura H, Izui K.** 2003. Phosphoenolpyruvate carboxylase: Three-dimensional structure and molecular mechanisms. *Archives of Biochemistry and Biophysics* **414**, 170-179.

**O'Leary B, Rao SK, Plaxton WC.** 2011. Phosphorylation of a bacterial-type phosphoenolpyruvate carboxylase at serine-425 provides a further tier of enzyme control in developing castor oil seeds. *Biochemical Journal* **433**, 65-74.
