# Supplementary material for: Tissue-specific expression and post-translational modifications of plant- and bacterial-type phosphoenolpyruvate carboxylase isozymes of the castor oil plant, Ricinus communis L
Source: PubMed Central journal article supplement — J Exp Bot. 2011 Aug 12;62(15):5485–95. doi: 10.1093/jxb/err225 (PMC3223045; doi:10.1093/jxb/err225), 2011-08-12

**Tissue-specific expression and post-translational modifications of plant- and bacterial-type phosphoenolpyruvate carboxylase isozymes of the castor oil plant, *Ricinus communis* L.**

*B. O'Leary, E. T. Fedosejevs, A. T. Hill, J. Bettridge, J. Park, S. K. Rao, C. A. Leach, and W. C. Plaxton*

**Supplemental Fig. S2.** Clarified extracts from several BTPC-containing castor tissues were subjected to SDS-PAGE and immunoblotting with anti-pSer425 in the presence of  $10 \mu\text{g ml}^{-1}$  of the corresponding dephospho-peptide. Each lane contains  $80 \mu\text{g}$  of protein except for the endosperm (E) lane which contains  $20 \mu\text{g}$  of protein. Abbreviations are as defined in Fig. 1.

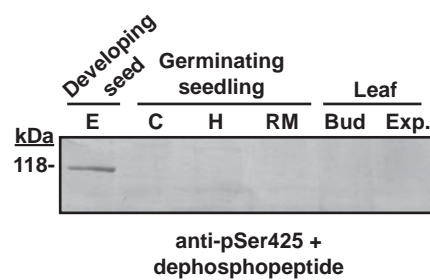

Supplement: supp_err225_00063230_file002.pdf [file supp_err225_00063230_file002.pdf]
